# Supplementary material for: AGuIX nanoparticle-nanobody bioconjugates to target immune checkpoint receptors
Source: Royal Society of Chemistry journal article supplement (doi:10.1039/d3nr04777f), 2023-12-06

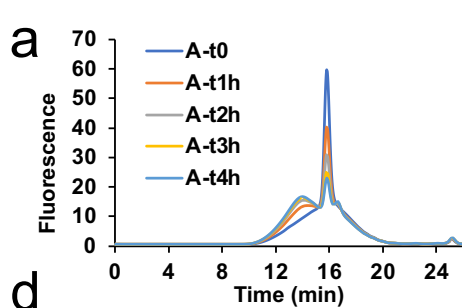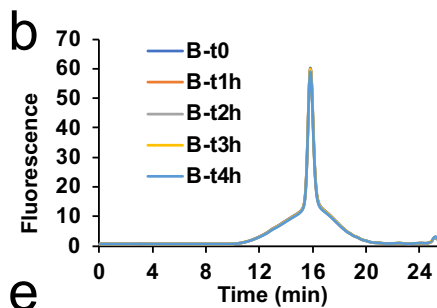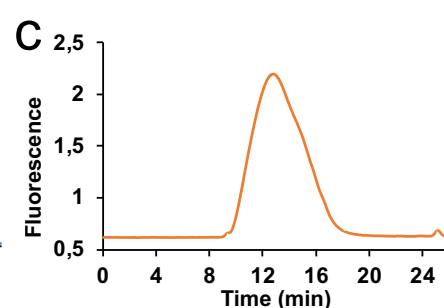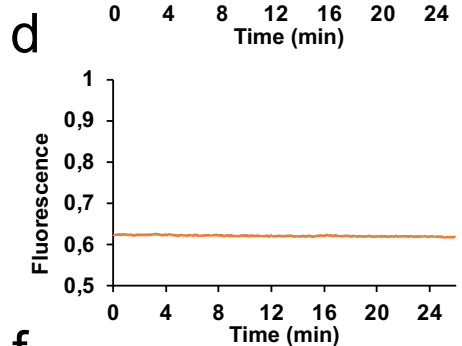

|                                            | 1     | 2     | 3     | 4     | 5     | 6     |
|--------------------------------------------|-------|-------|-------|-------|-------|-------|
| Molar ratio GGG/AGuIX NP <sup>a</sup>      | 0.283 | 2.10  | 2.10  | 2.10  | 2.10  | 2.10  |
| A12 (μM)                                   | 40    | 40    | 40    | 40    | 40    | 200   |
| GGG (μM)                                   | 600   | 600   | 120   | 40    | 120   | 600   |
| SrtA7m (μM)                                | 2.5   | 2.5   | 2.5   | 2.5   | 5     | 25    |
| Equiv. GGG/A12                             | 15    | 15    | 3     | 1     | 3     | 3     |
| Equiv. StrA7m/A12                          | 0.063 | 0.063 | 0.063 | 0.063 | 0.125 | 0.125 |
| Ligation yield (/A12) (%)                  | 43    | 36.7  | 19.8  | 14.8  | 33.0  | 31.7  |
| Molar ratio Gd/A12 in final product        | 301   | 90    | 43    | 15    | 18    | 18    |
| AGuIX NP/A12 in final product <sup>b</sup> | 20    | 6.0   | 2.8   | 1.0   | 1.2   | 1.2   |

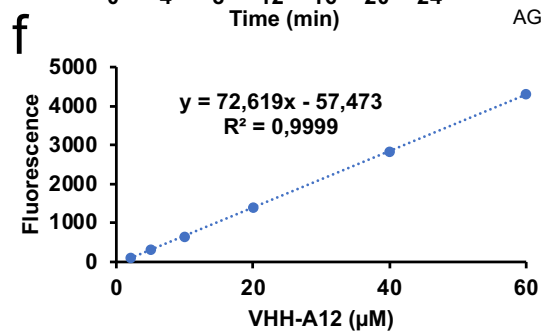

| Conc VHH (μM) | Fluorescence |
|---------------|--------------|
| 60            | 4315         |
| 40            | 2829         |
| 20            | 1391         |
| 10            | 656          |
| 5             | 308          |
| 2             | 106          |

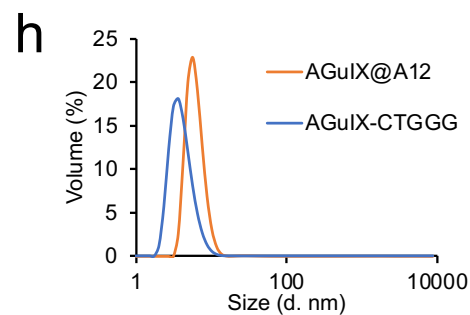

Supplement: d3nr04777f3.pdf [file d3nr04777f3.pdf]
