# Supplementary material for: AGuIX nanoparticle-nanobody bioconjugates to target immune checkpoint receptors
Source: Royal Society of Chemistry journal article supplement (doi:10.1039/d3nr04777f), 2023-12-06
Supplement: d3nr04777f10.pdf [file d3nr04777f10.pdf]

| Method                    | Sortagging reaction                                                                | Click chemistry                                                                |
|---------------------------|------------------------------------------------------------------------------------|--------------------------------------------------------------------------------|
| Number of synthesis steps | 3 steps                                                                            | 3 steps                                                                        |
| Required reagent          | GMBS<br>GGG(W/T)C peptide<br>Sortase A enzyme                                      | DBCO-PEG <sub>5</sub> -NHS<br>azide-PEG <sub>4</sub> -NHS                      |
| Reagent stability         | +                                                                                  | ++<br>(DBCO-PEG <sub>5</sub> -NHS needs to be used at <20mM in aqueous medium) |
| VHH modification          | no                                                                                 | yes                                                                            |
| Reaction selectivity      | High                                                                               | High                                                                           |
| Reaction speed            | Rapid (2-3h)                                                                       | Moderate (24h)                                                                 |
| Conversion yield          | Moderate (<50%)                                                                    | High (>95%)                                                                    |
| Final purification        | Sortase elimination + SEC preparative<br>(no elimination of excess AGuIX possible) | SEC preparative<br>(all excess reagents can be removed)                        |
| Ratio NP/VHH              | 1                                                                                  | 1                                                                              |
| DH (nm)                   | 6.1 ± 3.7 nm                                                                       | 5.4 ± 3.1 nm                                                                   |
| Reaction costs            | High<br>(Biomolecule production)                                                   | Moderate                                                                       |
| Scale-up potential        | Low                                                                                | High                                                                           |
