# Supplementary figures and images for: AGuIX nanoparticle-nanobody bioconjugates to target immune checkpoint receptors
Source: Royal Society of Chemistry journal article supplement (doi:10.1039/d3nr04777f), 2023-12-06

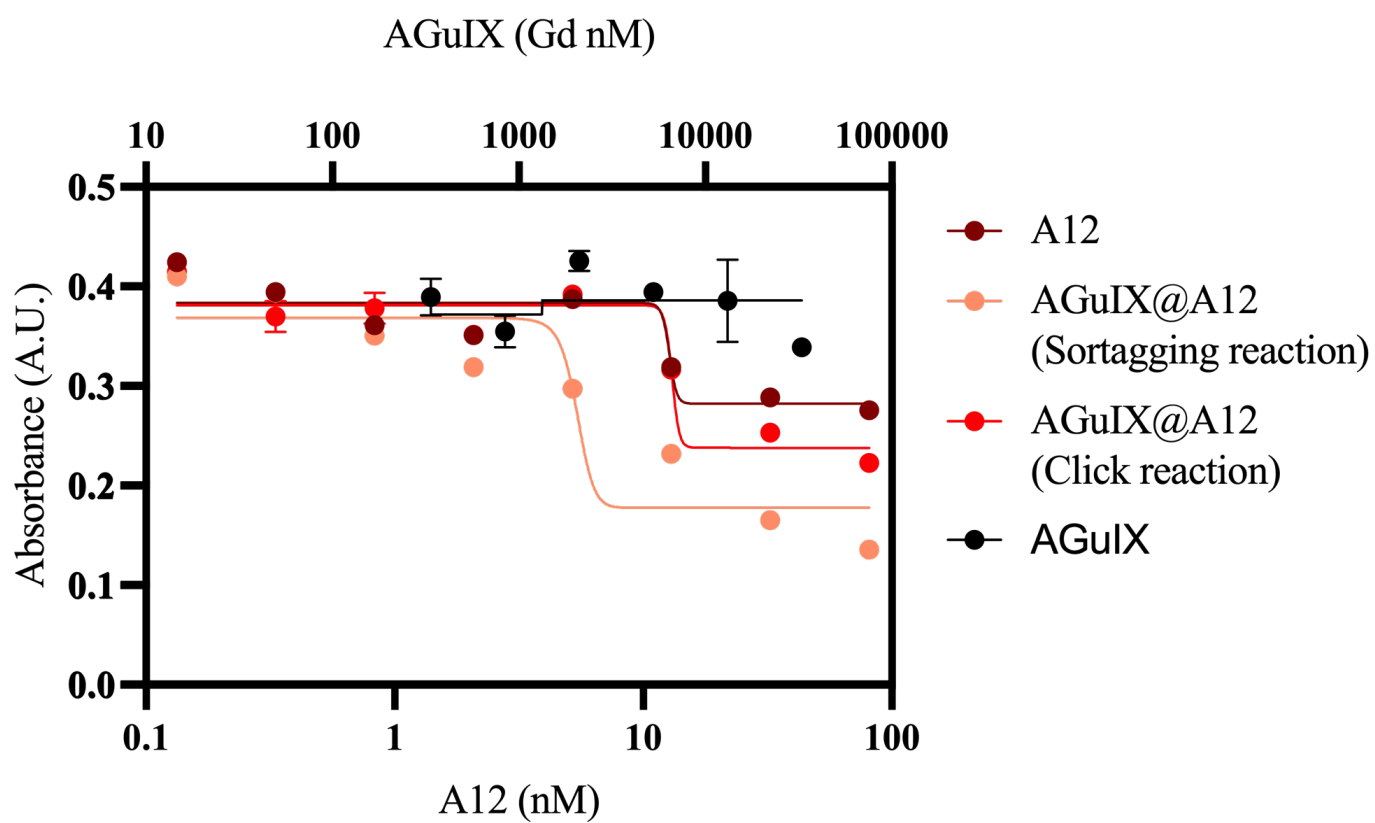

Supplement: d3nr04777f4.pdf [file d3nr04777f4.pdf]

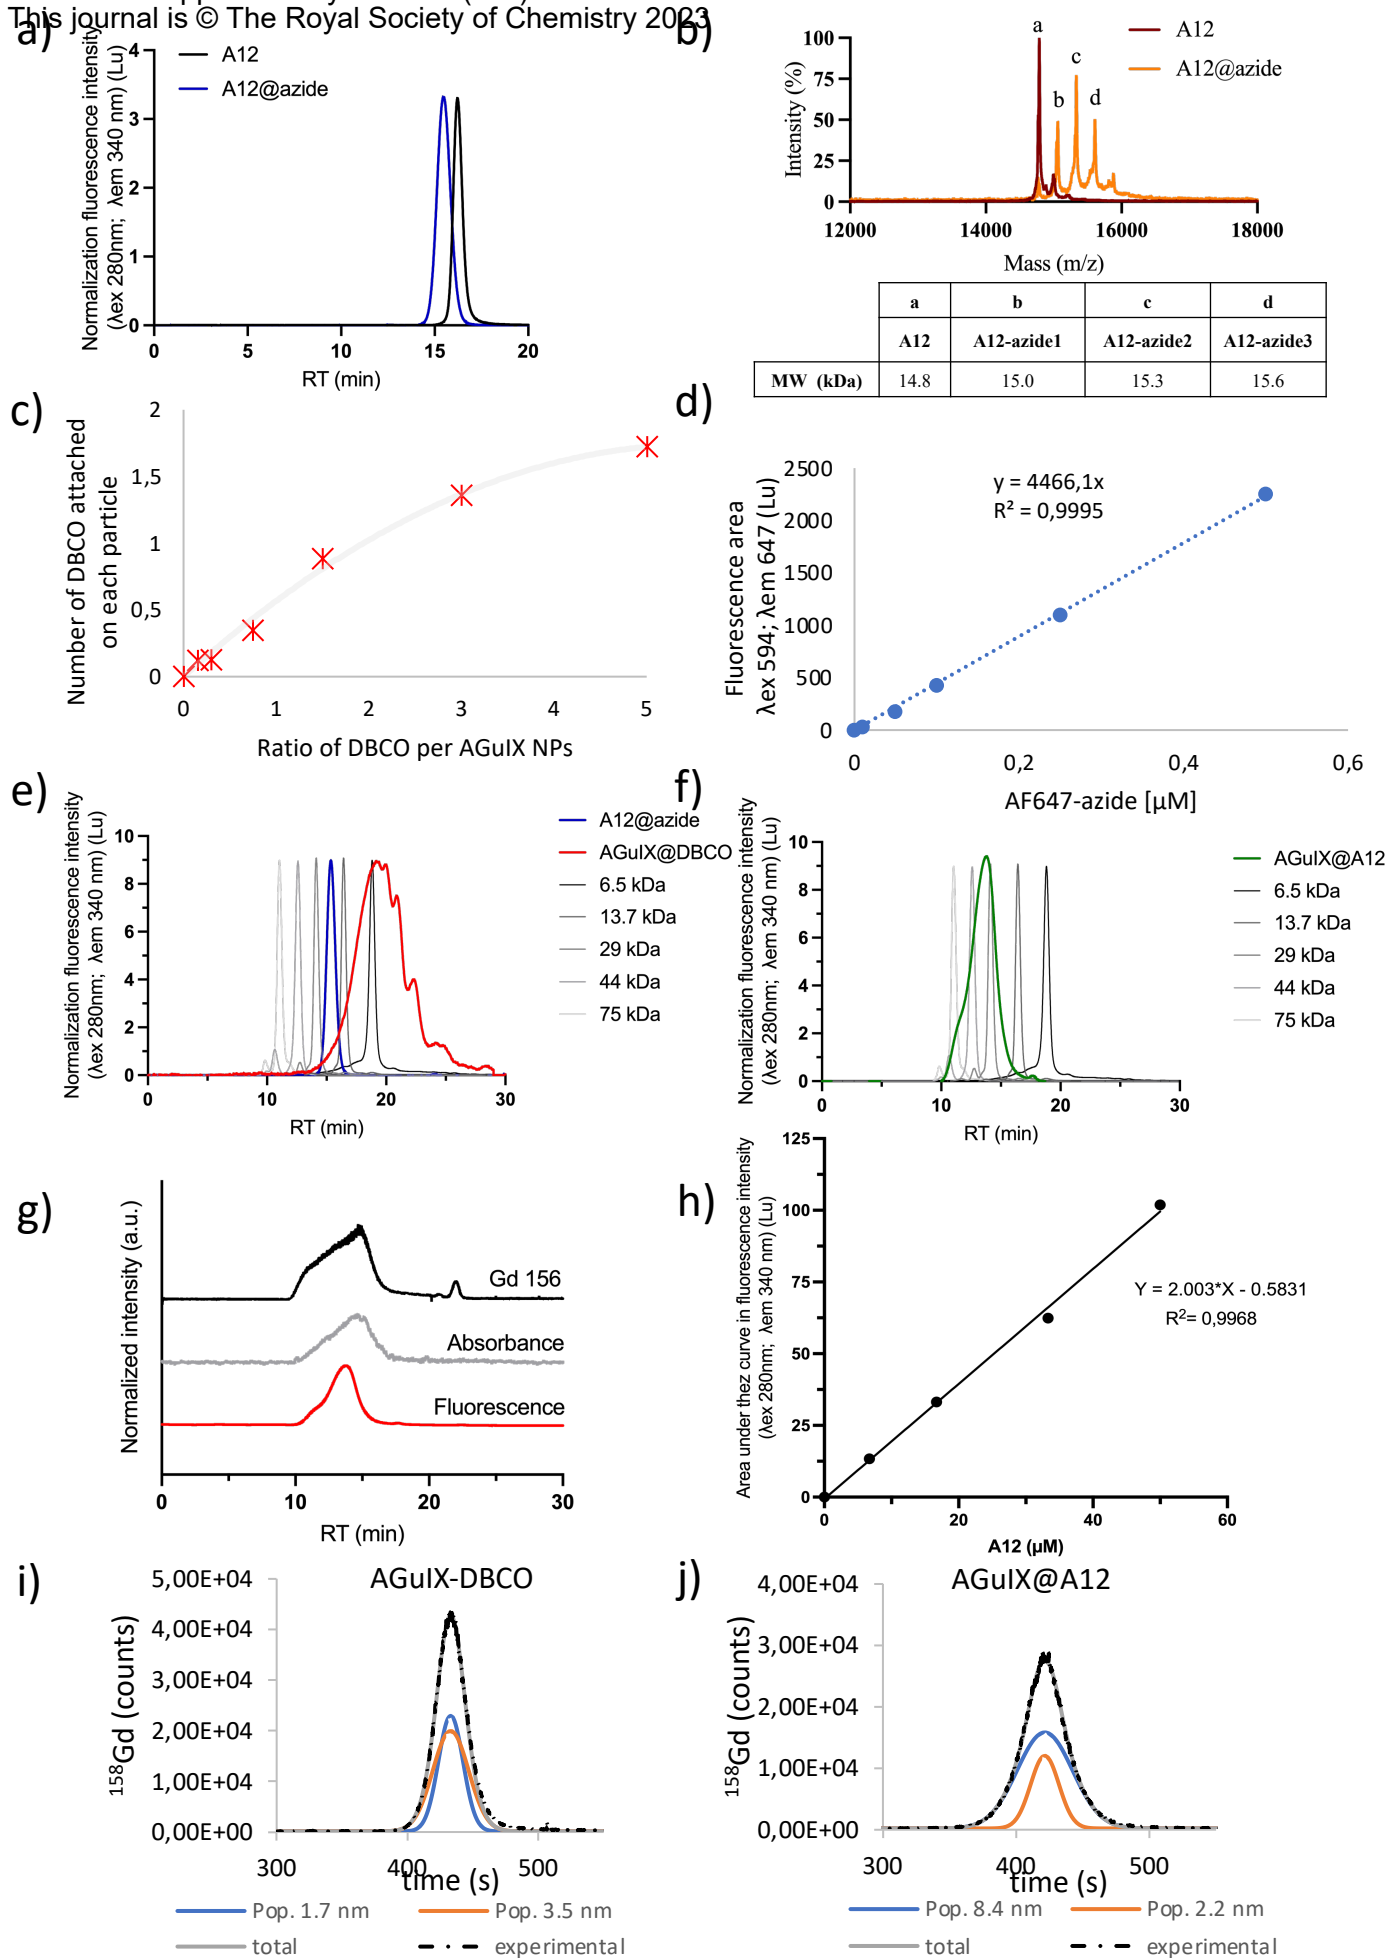

Supplement: d3nr04777f5.pdf [file d3nr04777f5.pdf]

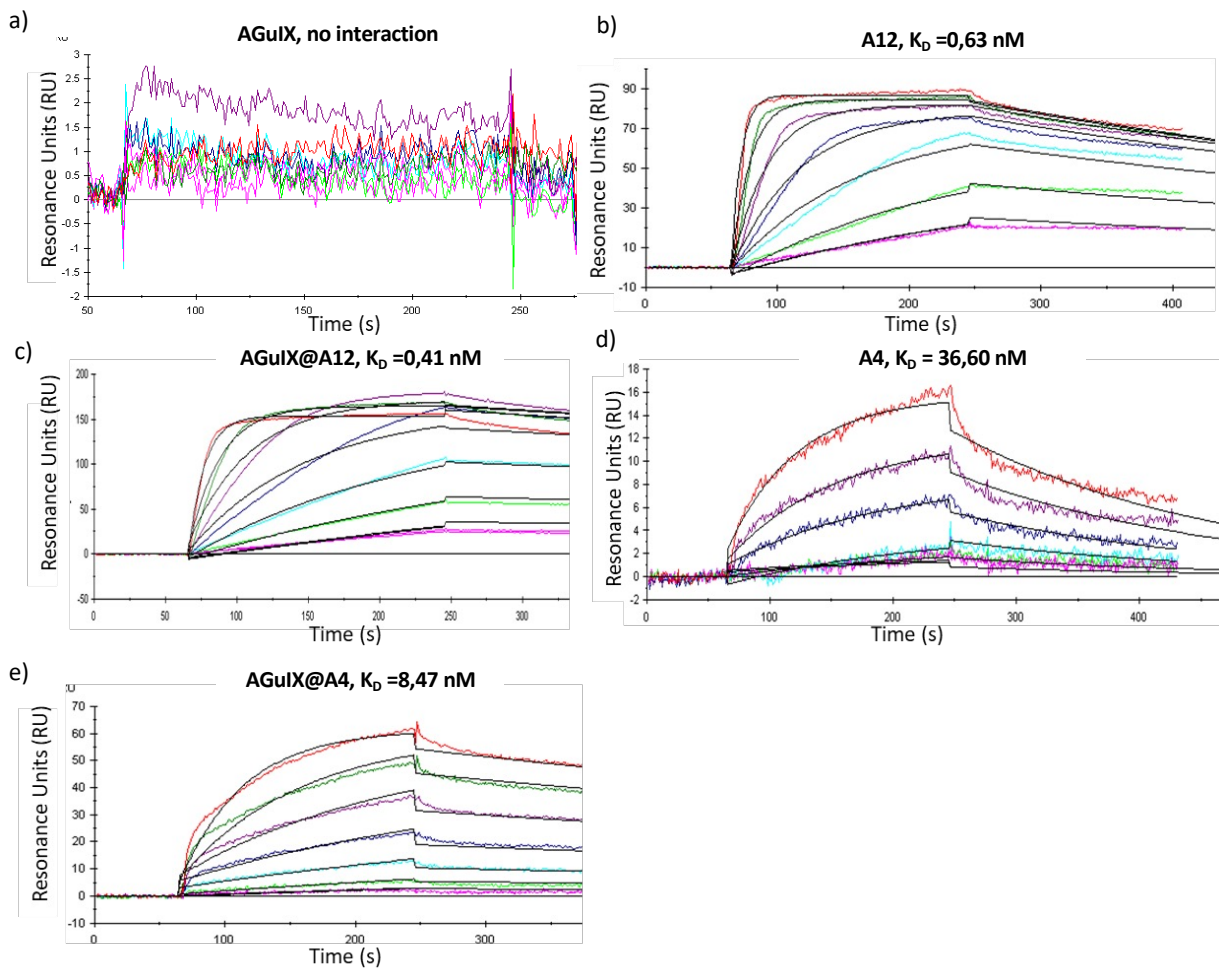

Supplement: d3nr04777f6.pdf [file d3nr04777f6.pdf]

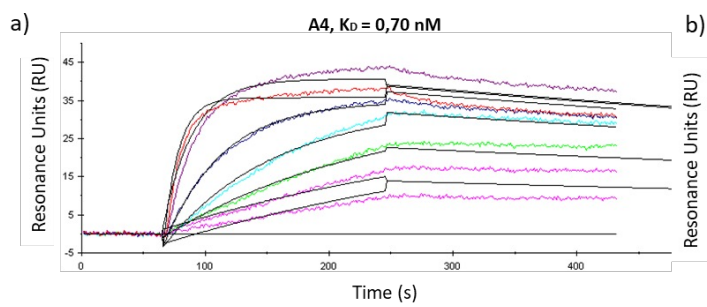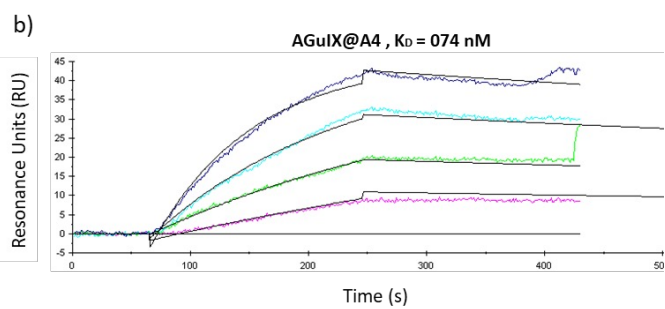

Supplement: d3nr04777f7.pdf [file d3nr04777f7.pdf]

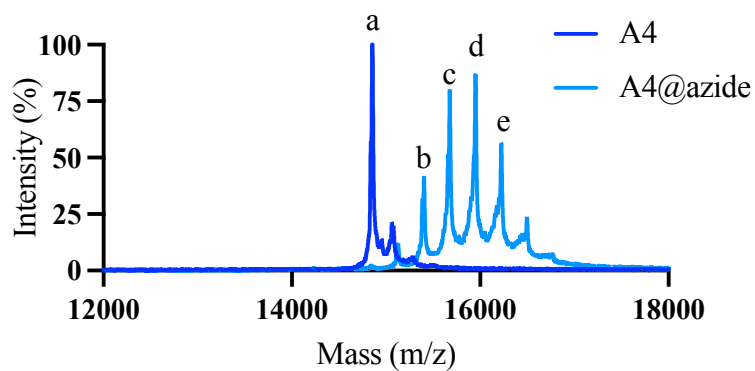

|                 | <b>a</b>  | <b>b</b>         | <b>c</b>         | <b>d</b>         | <b>e</b>         |
|-----------------|-----------|------------------|------------------|------------------|------------------|
|                 | <b>A4</b> | <b>A4-azide1</b> | <b>A4-azide2</b> | <b>A4-azide3</b> | <b>A4-azide4</b> |
| <b>MW (kDa)</b> | 14.8      | 15.1             | 15.4             | 15.7             | 15.9             |

Supplement: d3nr04777f8.pdf [file d3nr04777f8.pdf]

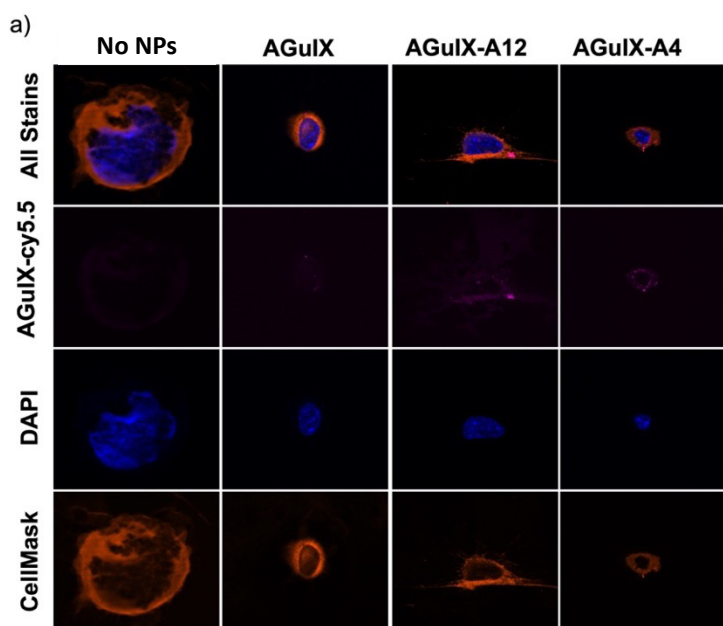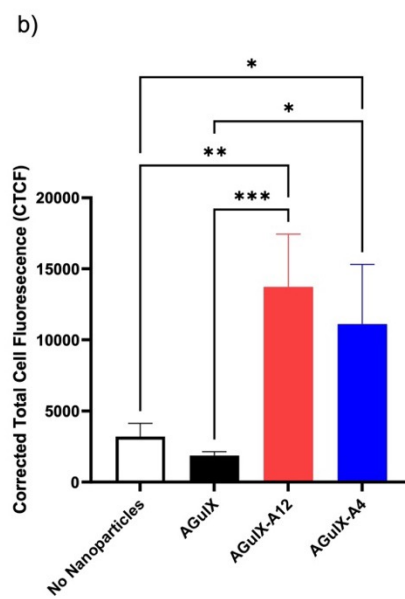

Supplement: d3nr04777f9.pdf [file d3nr04777f9.pdf]
